# Supplementary material
Source: PubMed Central journal article supplement (PMC6078415)
Supplement: NIHMS980035-supplement-2.pdf [file NIHMS980035-supplement-2.pdf]

Summary of patient characteristics with newly diagnosed HNSCC

|                                    | All patients | SMAD-positive | SMAD-negative | P value                  |
|------------------------------------|--------------|---------------|---------------|--------------------------|
| <b>Marker</b>                      |              |               |               |                          |
| SMAD4                              | 130          | 113 (86.9%)   | 6 (4.6%)      |                          |
| N/A                                | 11 (8.5%)    |               |               |                          |
| <b>Age at diagnosis</b>            |              |               |               | 0.21                     |
| Mean(SD)                           | 59.3 (13.1)  | 59.5 (13.1)   | 67.5 (15)     |                          |
| Median, range                      | 58, 58–94    | 58, 58–94     | 64, 64–93     |                          |
| <b>Gender</b>                      |              |               |               | 0.35                     |
| Female                             | 34( 26.2%)   | 30 (26.5%)    | 3 (50%)       |                          |
| Male                               | 96 (73.8%)   | 83 (73.5%)    | 3 (50%)       |                          |
| <b>Primary tumor site</b>          |              |               |               | 0.21                     |
| Oropharynx                         | 63 (48.5%)   | 56 (49.6%)    | 1 (16.7%)     |                          |
| Other                              | 67 (51.5%)   | 57 (50.4%)    | 5 (83.3%)     |                          |
| <b>T stage at diagnosis</b>        |              |               |               | 0.21(T0/T1/T2 vs. T3/T4) |
| T0                                 | 3 (2.3%)     | 2 (1.8%)      | 1 (16.7%)     |                          |
| T1                                 | 17 (13.1%)   | 13 (11.5%)    | 3 (50%)       |                          |
| T2                                 | 50 (38.5%)   | 44 (38.9%)    | 1 (16.7%)     |                          |
| T3                                 | 17 (13.1%)   | 14 (12.4%)    | 0 (0%)        |                          |
| T4                                 | 43 (33.1%)   | 40 (35.4%)    | 1 (16.7%)     |                          |
| <b>N stage at diagnosis</b>        |              |               |               | 0.4(N0/N1 vs. N2/N3)     |
| N0                                 | 27 (20.8%)   | 25 (22.1%)    | 2 (33.3%)     |                          |
| N1                                 | 14 (10.8%)   | 12 (10.6%)    | 1 (16.7%)     |                          |
| N2                                 | 69 (53.1%)   | 61 (54%)      | 2 (33.3%)     |                          |
| N3                                 | 20 (15.4%)   | 15 (13.3%)    | 1 (16.7%)     |                          |
| <b>Recurrence</b>                  |              |               |               |                          |
| Local                              | 39 (30%)     | 34 (30.1%)    | 4 (66.7%)     |                          |
| Distant                            | 10 (7.7%)    | 8 (7.1%)      | 1 (16.7%)     |                          |
| Local and distant                  | 9 (6.9%)     | 8 (7.1%)      | 0 (0%)        |                          |
| No recurrence                      | 72 (55.4%)   | 63 (55.8%)    | 1 (16.7%)     |                          |
| <b>p16 among oropharynx cancer</b> |              |               |               | 0.47                     |
| Positive                           | 32 (50.8%)   | 30 (53.6%)    | 0 (0)         |                          |
| Negative                           | 31 (49.2%)   | 26 (46.4%)    | 1 (100)       |                          |

Supplemental Table 1

## Summary of patient characteristics with recurrent HNSCC

|                                    | All patients | SMAD-positive | SMAD-negative | P value                |
|------------------------------------|--------------|---------------|---------------|------------------------|
| <b>Marker</b>                      |              |               |               |                        |
| SMAD4                              | 43           | 32 (74.4%)    | 11 (25.6%)    |                        |
| <b>Age at diagnosis</b>            |              |               |               |                        |
| Mean (SD)                          | 55.1 (11.9)  | 55.0 (11.1)   | 55.4 (14.6)   | 0.6                    |
| Median, range                      | 54, 28-92    | 56, 28-77     | 52, 36-92     |                        |
| <b>Gender</b>                      |              |               |               |                        |
| Female                             | 12 (27.9%)   | 10 (31.2%)    | 2 (18.2%)     | 0.7                    |
| Male                               | 31 (72.1%)   | 22 (68.8%)    | 9 (81.8%)     |                        |
| <b>Race</b>                        |              |               |               |                        |
| White                              | 37 (86.0%)   | 28 (87.5%)    | 9 (81.8%)     | 0.64                   |
| Black                              | 6 (14.0%)    | 4 (12.5%)     | 2 (18.2%)     |                        |
| <b>Primary tumor site</b>          |              |               |               |                        |
| Oropharynx                         | 11 (25.6%)   | 10 (31.2%)    | 1 (9.1%)      | 0.24                   |
| Other                              | 32 (74.4%)   | 22 (68.8%)    | 10 (90.9%)    |                        |
| <b>T stage at diagnosis</b>        |              |               |               |                        |
| T1                                 | 12 (28.6%)   | 8 (25.8%)     | 4 (36.4%)     | 0.73 (T1/T2 vs. T3/T4) |
| T2                                 | 16 (38.1%)   | 12 (38.7%)    | 4 (36.4%)     |                        |
| T3                                 | 9 (21.4%)    | 8 (25.8%)     | 1 (9.1%)      |                        |
| T4                                 | 5 (11.9%)    | 3 (9.7%)      | 2 (18.2%)     |                        |
| <b>N stage at diagnosis</b>        |              |               |               |                        |
| N0                                 | 15 (35.7%)   | 12 (38.7%)    | 3 (27.3%)     | 0.18 (N0/N1 vs. N2/N3) |
| N1                                 | 8 (19.0%)    | 7 (22.6%)     | 1 (9.1%)      |                        |
| N2                                 | 17 (40.5%)   | 12 (38.7%)    | 5 (45.4%)     |                        |
| N3                                 | 2 (4.8%)     | 0 (0)         | 2 (18.2%)     |                        |
| <b>M stage at diagnosis</b>        |              |               |               |                        |
| M0                                 | 37 (88.1%)   | 28 (90.3%)    | 9 (81.8%)     | 0.59                   |
| M1                                 | 5 (11.9%)    | 3 (9.7%)      | 2 (18.2%)     |                        |
| <b>Pathology differentiation</b>   |              |               |               |                        |
| Poor                               | 9 (20.9%)    | 5 (15.6%)     | 4 (36.4%)     | 0.06                   |
| Modest                             | 25 (58.1%)   | 20 (62.5%)    | 5 (45.4%)     |                        |
| Well                               | 3 (7.0%)     | 1 (3.1%)      | 2 (18.2%)     |                        |
| NOS                                | 6 (14.0%)    | 6 (18.8%)     | 0 (0)         |                        |
| <b>Recurrence*</b>                 |              |               |               |                        |
| Local                              | 28 (66.7%)   | 22 (68.7%)    | 6 (60.0%)     | 0.49                   |
| Distant                            | 11 (26.2%)   | 7 (21.9%)     | 4 (40.0%)     |                        |
| Distant and local                  | 3 (7.1%)     | 3 (9.4%)      | 0 (0)         |                        |
| <b>p16 among oropharynx cancer</b> |              |               |               |                        |
| Positive                           | 5 (45.4%)    | 5 (50%)       | 0 (0)         | 0.99                   |
| Negative                           | 6 (54.6%)    | 5 (50%)       | 1 (100%)      |                        |

\*Among the 11 SMAD4 negative patients, 4 (40%) developed distant mets (including distant, distant and local), while for the 32 SMAD4 positive patients, 10 (31.3%) had distant mets (p value =0.71).

|            | # of injected cells | # of mice | # of mice with implanted tumor | # of mice with L/N metastasis |
|------------|---------------------|-----------|--------------------------------|-------------------------------|
| FaDu-mock  | $5 \times 10^5$     | 5         | 5                              | 2                             |
| FaDu-SMAD4 | $5 \times 10^5$     | 5         | 2                              | 0                             |

L/N - lymph node

### Supplemental Table 3.
