# Supplementary material
Source: PubMed Central journal article supplement (PMC6078415)
Supplement: NIHMS980035-supplement-3.pdf [file NIHMS980035-supplement-3.pdf]

**A.****Malignant SCC****SMAD4-negative****SMAD4-positive****anti-SMAD4 staining**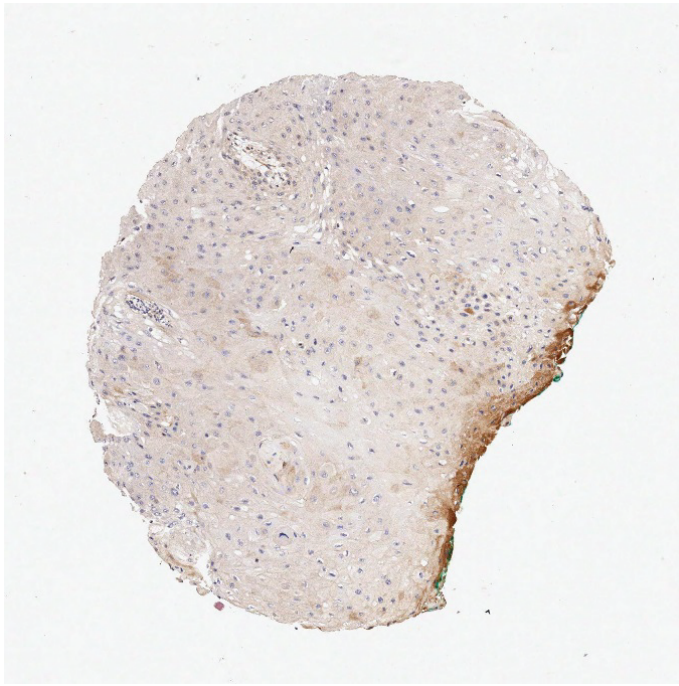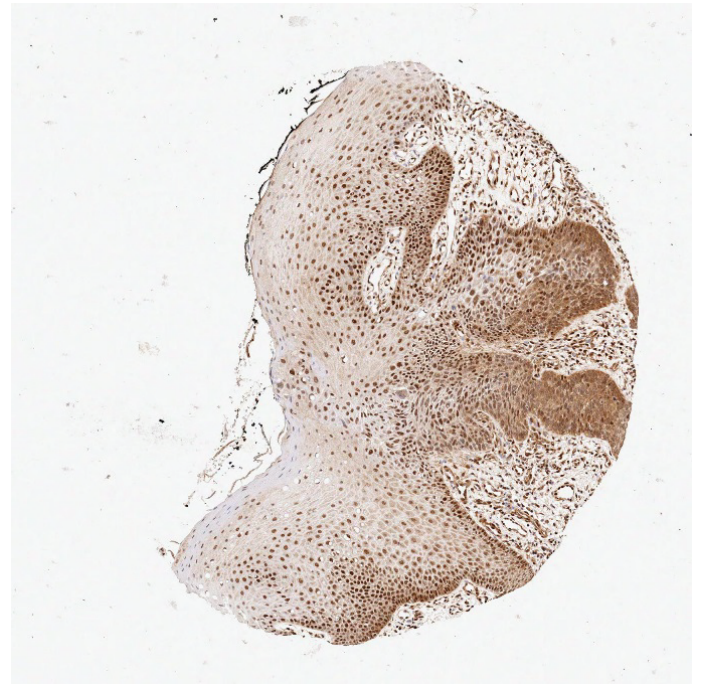**B.****FaDu****SCC25****SCC61****anti-SMAD4 staining**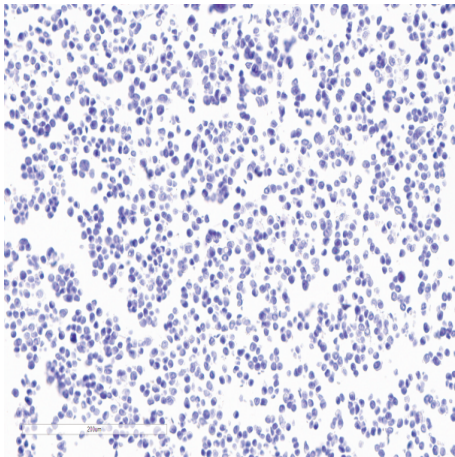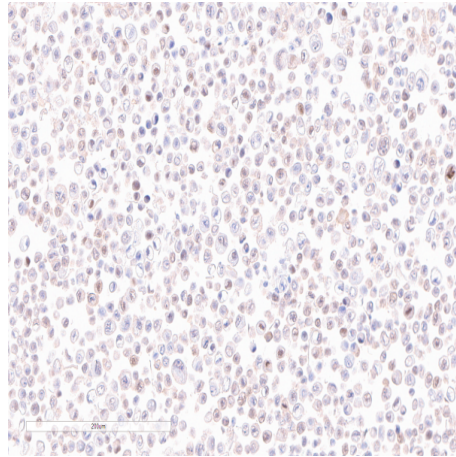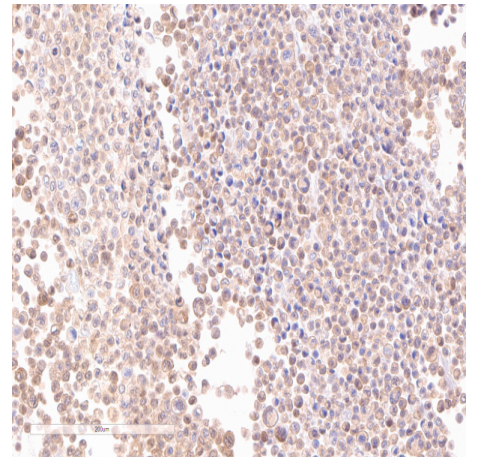**C.****FaDu****SCC25****SCC61****mock staining**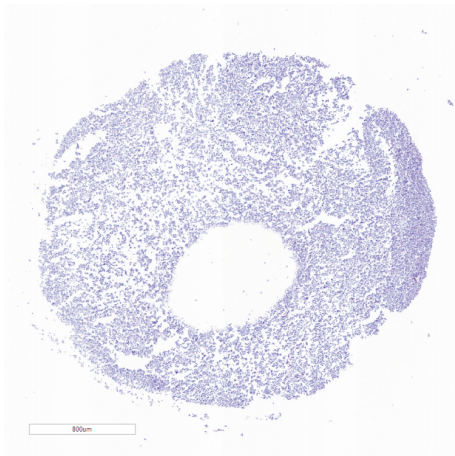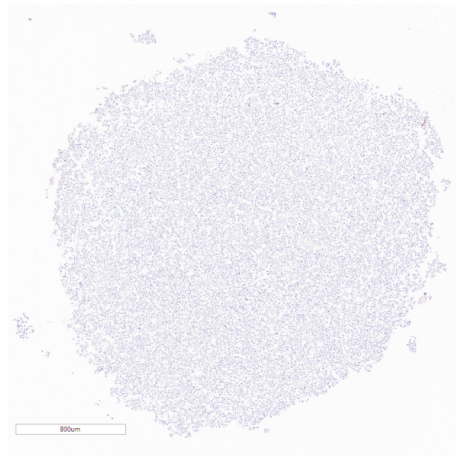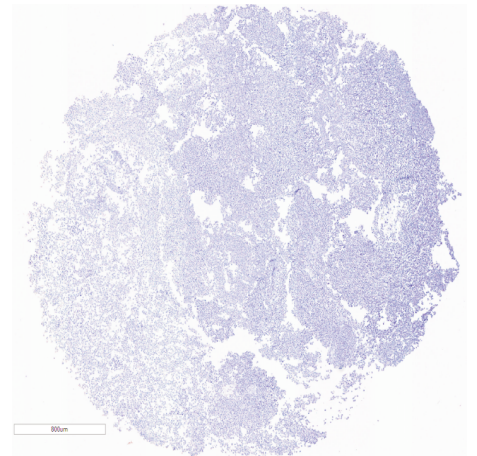**Supplemental Figure 1**
