# Supplementary material
Source: PubMed Central journal article supplement (PMC6078415)

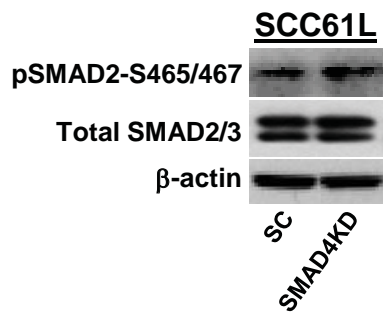

**Supplemental Figure 2.**

Supplement: NIHMS980035-supplement-4.pdf [file NIHMS980035-supplement-4.pdf]

**A.**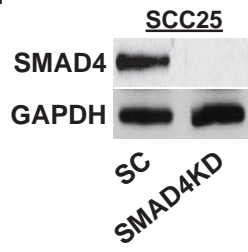**B.**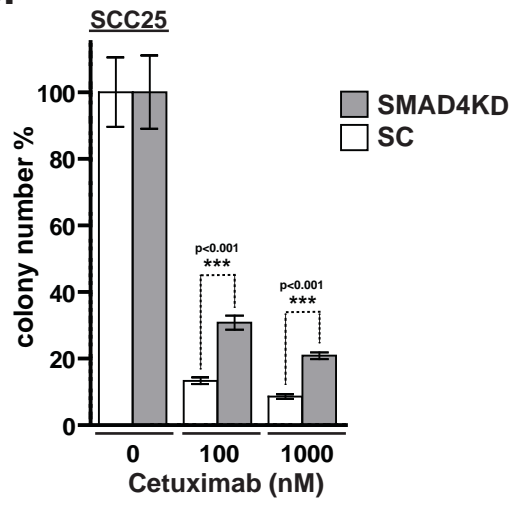**C.**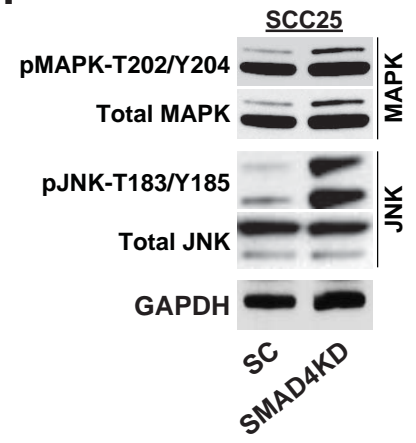**Supplemental Figure 3**

Supplement: NIHMS980035-supplement-5.pdf [file NIHMS980035-supplement-5.pdf]

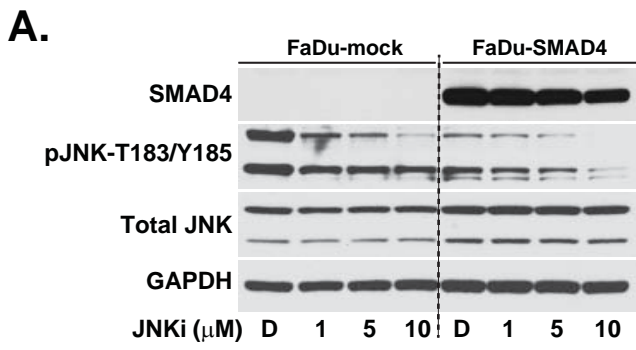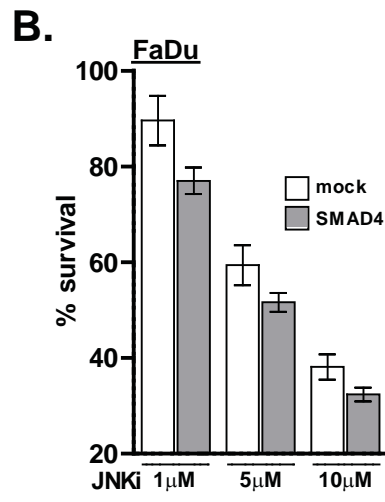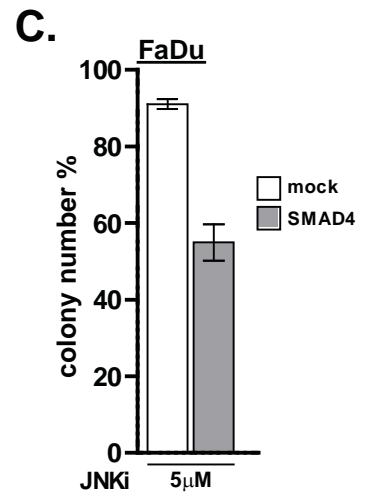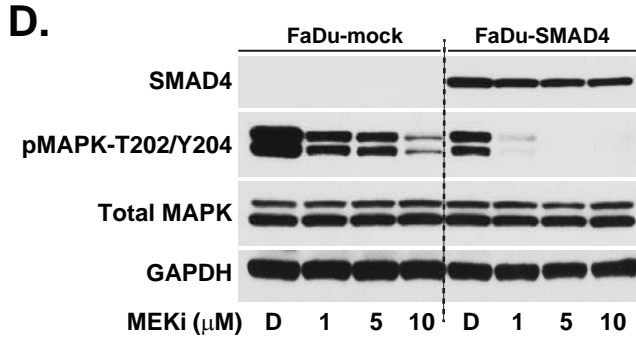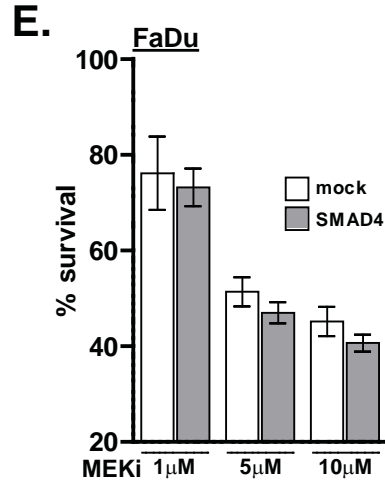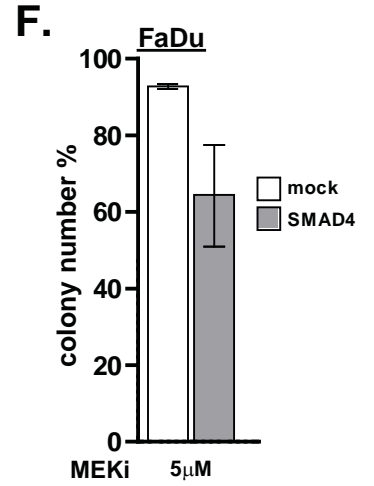

Supplemental Figure 4

Supplement: NIHMS980035-supplement-6.pdf [file NIHMS980035-supplement-6.pdf]

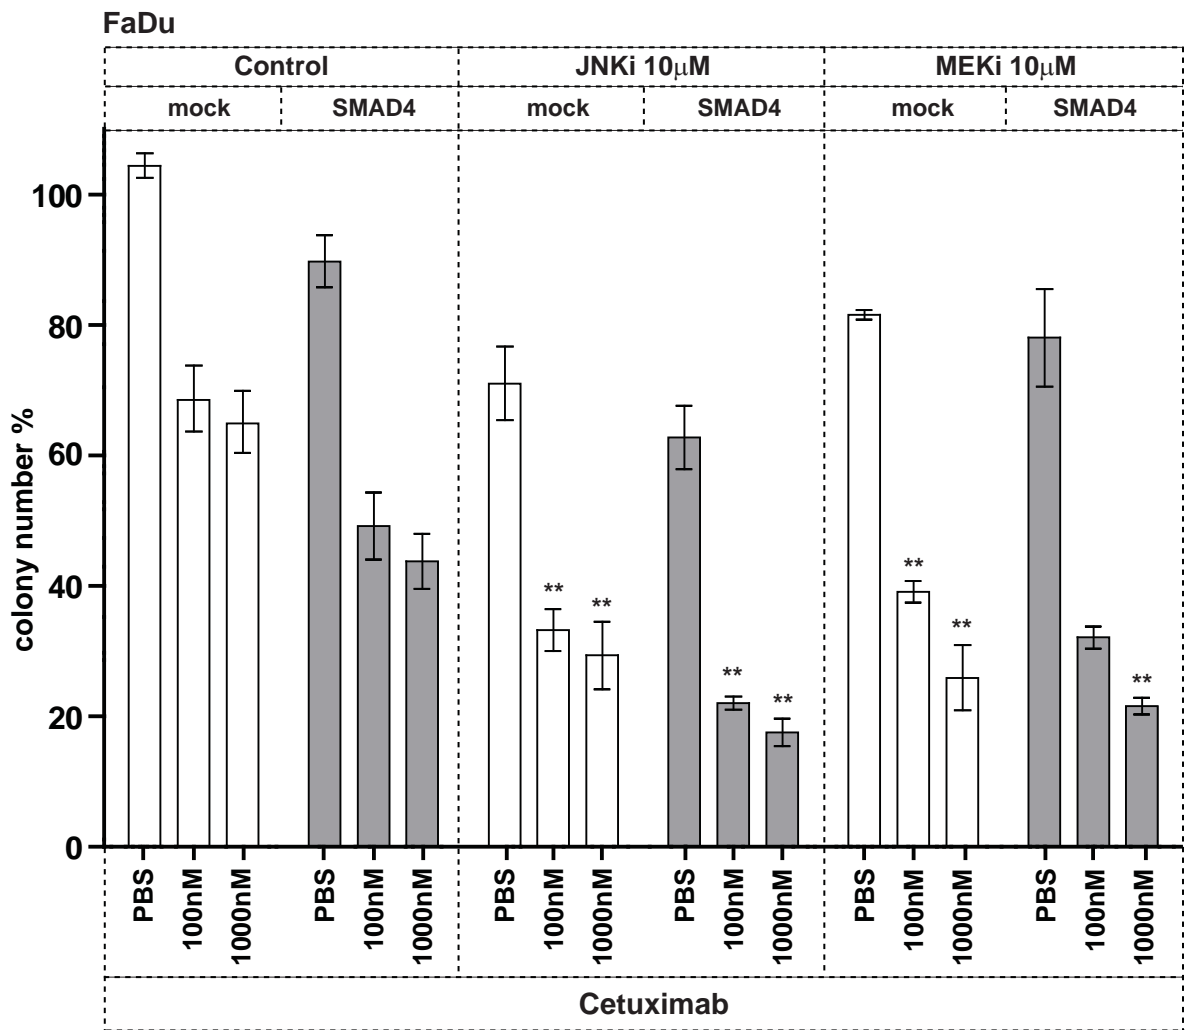

**Supplemental Figure 5**

Supplement: NIHMS980035-supplement-7.pdf [file NIHMS980035-supplement-7.pdf]
